# Supplementary material
Source: PubMed Central journal article supplement (PMC3520543)
Supplement: supp_M029017_jlr.M029017-1.pdf [file supp_M029017_jlr.M029017-1.pdf]

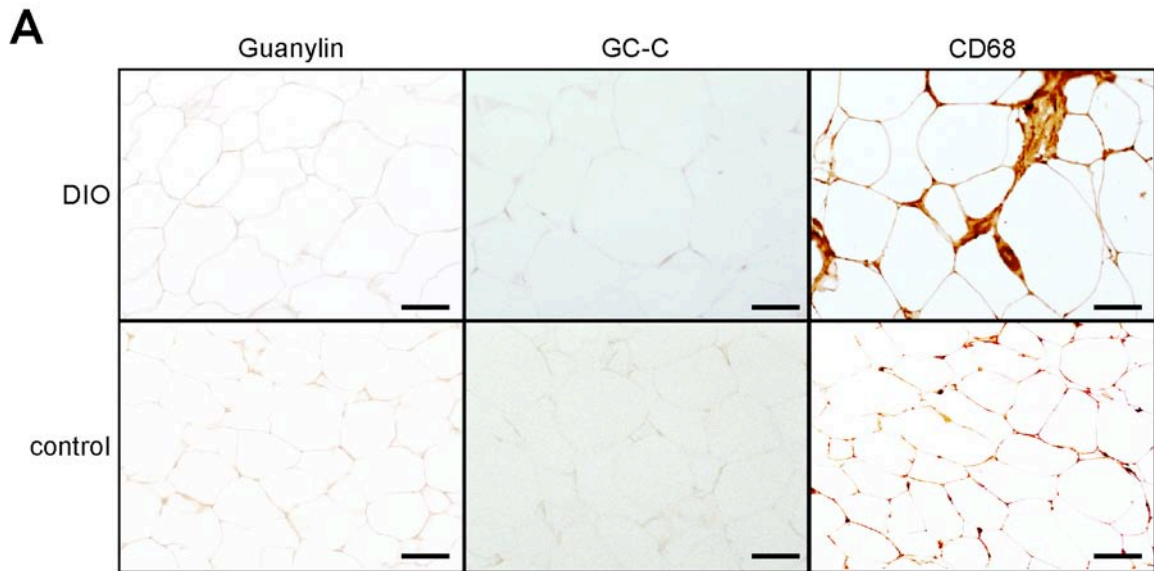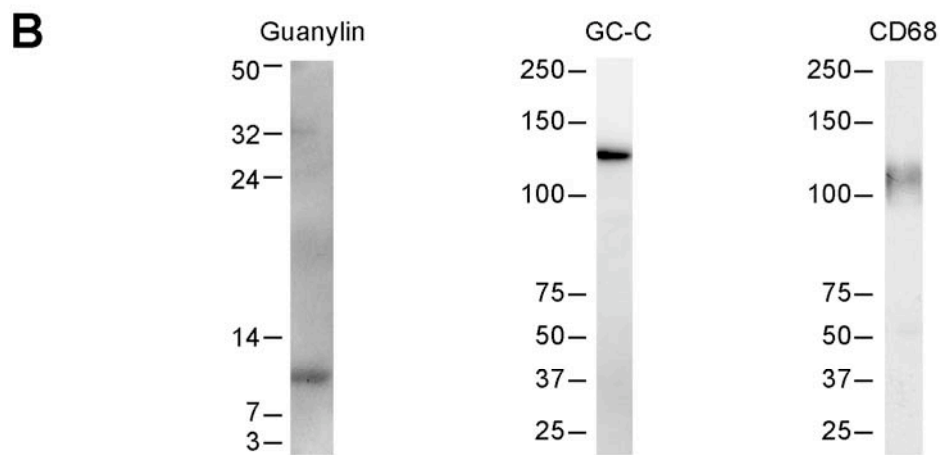

**Supplementary Figure 1. (A)** Immunostaining of mesenteric fat with anti-guanylin, anti-GC-C, and anti-CD68 antibodies in high-fat diet-induced obesity (DIO) rats and control rats. Left panel, guanylin; Middle panel, GC-C; Right panel, CD68 (brown), Scale bar, 50  $\mu$ m. **(B)** Western blot analysis of guanylin, GC-C, and CD68 in extracts of the Tg mesenteric fat.

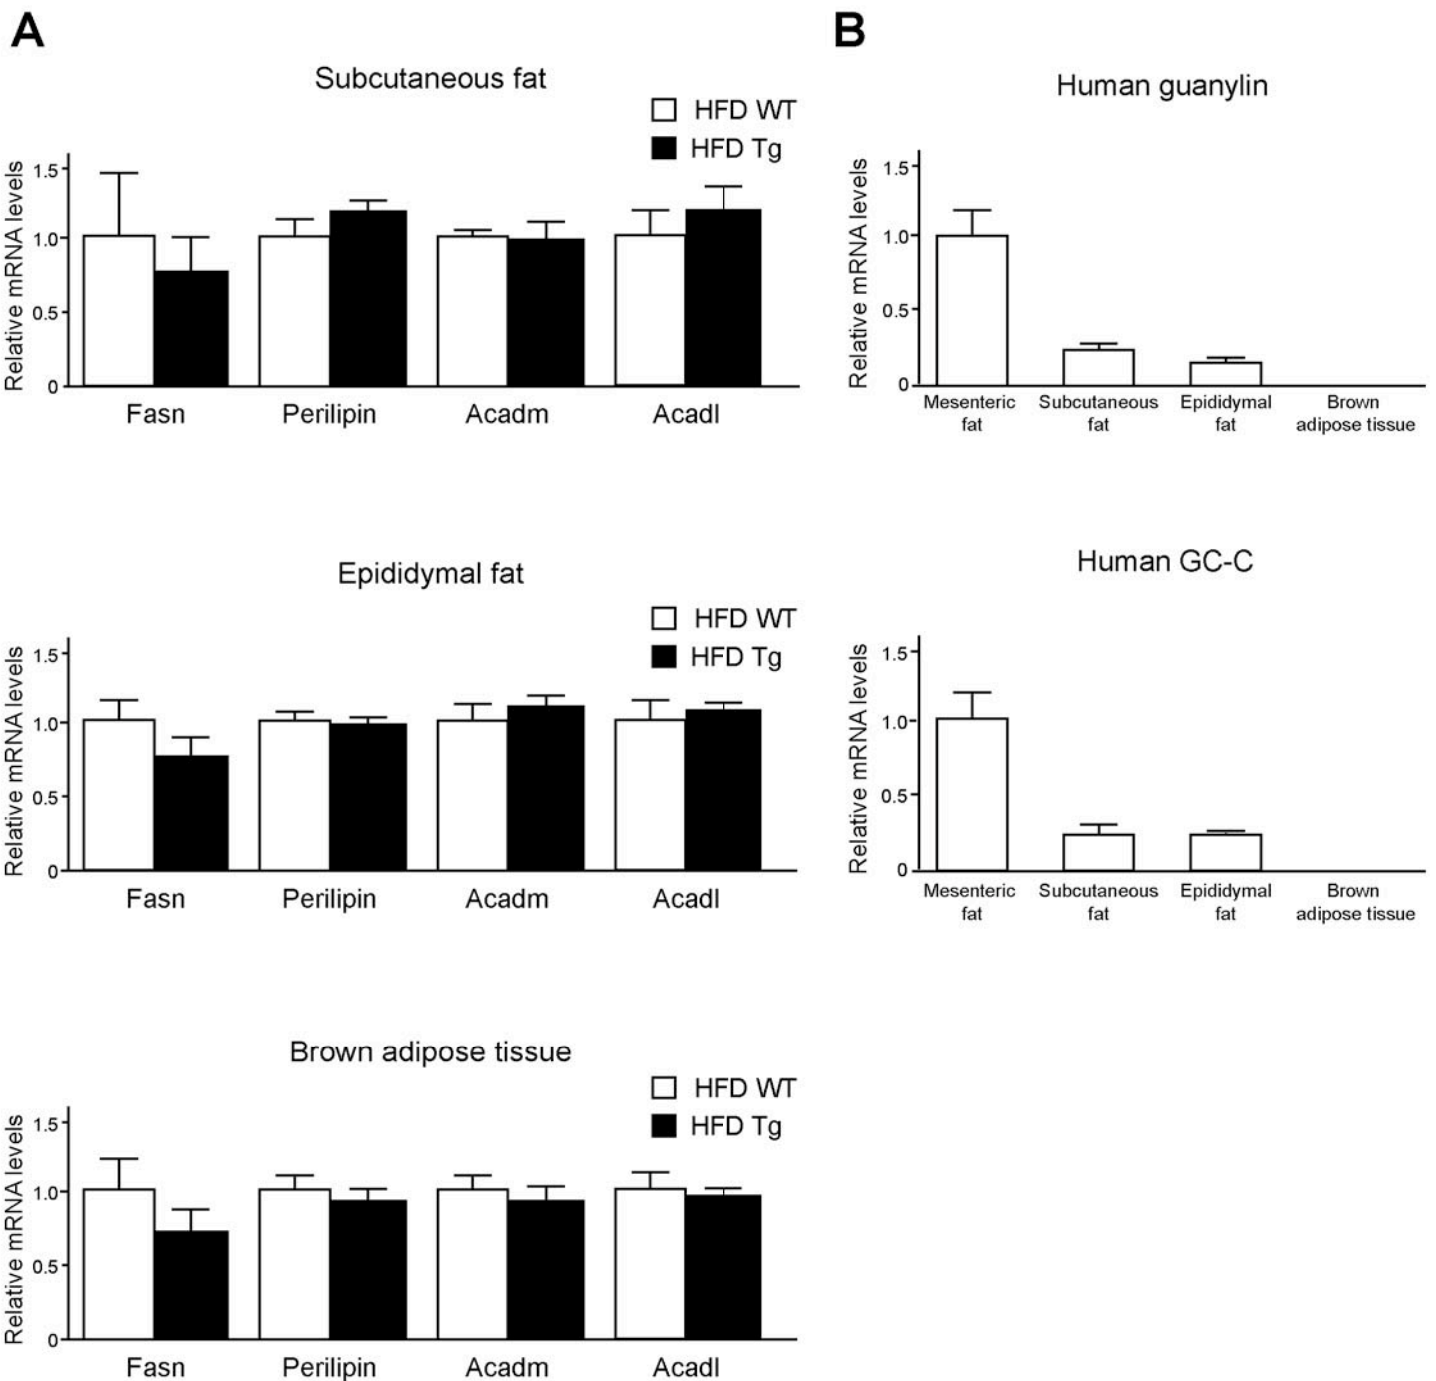

**Supplementary Figure 2. (A)** mRNA expression in the subcutaneous fat, epididymal fat, and brown adipose tissue of WT and guanylin-GC-C double-Tg rats. Data were normalized against GAPDH mRNA levels and are presented as means  $\pm$  SEM ( $n = 4$  or  $5$ ). **(B)** mRNA levels of human guanylin and human GC-C in the mesenteric fat, subcutaneous fat, epididymal fat, and brown adipose tissue of HFD Tg rats. Data were normalized against GAPDH mRNA levels and were expressed as fold induction relative to that of mesenteric fat. Data are presented as means  $\pm$  SEM ( $n = 4$  or  $5$ ).

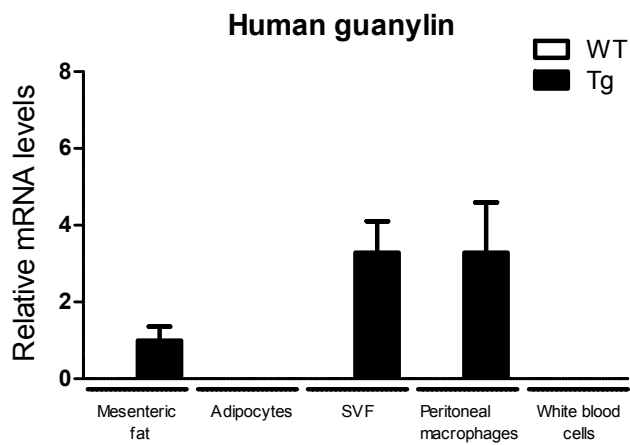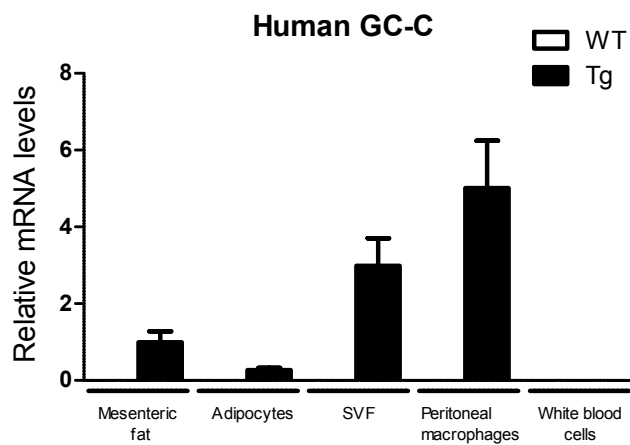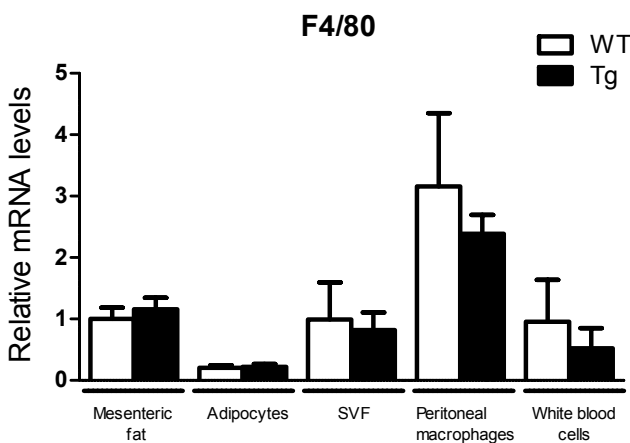

**Supplementary Figure 3.** mRNA levels of human guanylin, human GC-C and F4/80 in the mesenteric fat, adipocytes, stromal vascular fraction (SVF), peritoneal macrophages, and peripheral white blood cells of WT rats and Tg rats. Data were normalized against the 36B4 mRNA levels and were expressed as fold induction relative to that of mesenteric fat derived from Tg rats. Data are presented as means  $\pm$  SEM (n = 4).

**Supplementary Table 1.** Top 100 specifically up-regulated genes in guanylin/GC-C high expressed rats compared with control, DIO, and guanylin/GC-C low expressed rats.

| Fold change ([gua/GC-C high expressed DR] vs [control]) | Fold change ([DIO] vs [control]) | Fold change ([gua/GC-C low expressed DR] vs [control]) | Affymetrix probe set ID | Gene Symbol | Gene Title                                                     |
|---------------------------------------------------------|----------------------------------|--------------------------------------------------------|-------------------------|-------------|----------------------------------------------------------------|
| 147.14474                                               | -1.0964204                       | -1.1947889                                             | 1369111_at              | Fabp1       | fatty acid binding protein 1, liver                            |
| 112.548615                                              | -1.0358278                       | -1.0658016                                             | 1372922_at              | LOC691259   | hypothetical protein LOC691259                                 |
| 111.325096                                              | -1.0411407                       | 1.0087899                                              | 1368269_at              | Lgals4      | lectin, galactoside-binding, soluble, 4                        |
| 102.0206                                                | 1.0039177                        | -1.0883106                                             | 1390238_at              | Clca3       | chloride channel calcium activated 3                           |
| 82.202194                                               | 1.1993738                        | -1.0115223                                             | 1368586_at              | Zg16        | zymogen granule protein 16                                     |
| 79.03206                                                | 1.0580212                        | -1.0815662                                             | 1378658_at              | Clca4       | chloride channel calcium activated 4                           |
| 65.94027                                                | -1.01929                         | -1.0763283                                             | 1369195_at              | Fabp2       | fatty acid binding protein 2, intestinal                       |
| 60.74142                                                | 1.0563285                        | -1.030266                                              | 1395853_at              | Clca3       | chloride channel calcium activated 3                           |
| 59.37088                                                | 1.3294017                        | -1.0127926                                             | 1388199_at              | Epcam       | epithelial cell adhesion molecule                              |
| 55.99972                                                | 1.0454261                        | 1.0495839                                              | 1368471_at              | Guca2a      | guanylate cyclase activator 2a (guanylin)                      |
| 49.29587                                                | 1.0665547                        | 1.1531565                                              | 1369224_at              | Cdh17       | cadherin 17                                                    |
| 48.559757                                               | 1.138888                         | 1.1120383                                              | 1370387_at              | Cyp3a9      | cytochrome P450, family 3, subfamily a, polypeptide 9          |
| 47.14064                                                | 2.2939198                        | 1.0279789                                              | 1368413_at              | Abp1        | amiloride binding protein 1 (amine oxidase, copper-containing) |
| 43.845566                                               | 1.1020275                        | 1.014531                                               | 1370894_at              | Cldn7       | claudin 7                                                      |
| 43.73931                                                | -1.0783587                       | 1.0489403                                              | 1383970_at              |             |                                                                |
| 43.222485                                               | -1.0001742                       | 1.006014                                               | 1368236_at              | Mep1a       | meprin 1 alpha                                                 |
| 43.218243                                               | -1.0690651                       | -1.0886675                                             | 1371099_at              |             |                                                                |
| 43.172997                                               | 1.0454063                        | 1.1495814                                              | 1387314_at              | Sult1b1     | sulfotransferase family, cytosolic, 1B, member 1               |
| 42.597134                                               | -1.1121064                       | -1.0289764                                             | 1390566_a_at            | Ckmt1       | creatine kinase, mitochondrial 1, ubiquitous                   |
| 40.36157                                                | 1.0091859                        | -1.0251019                                             | 1368697_at              | Fabp6       | fatty acid binding protein 6, ileal                            |
| 37.10351                                                | -1.1901146                       | 1.0773925                                              | 1386947_at              | Cdh1        | cadherin 1                                                     |
| 32.467396                                               | 1.0329326                        | 1.0187325                                              | 1388006_at              | Muc13       | mucin 13, cell surface associated                              |

| Fold change ([gua/GC-C high expressed DR] vs [control]) | Fold change ([DIO] vs [control]) | Fold change ([gua/GC-C low expressed DR] vs [control]) | Affymetrix probe set ID | Gene Symbol | Gene Title                                            |
|---------------------------------------------------------|----------------------------------|--------------------------------------------------------|-------------------------|-------------|-------------------------------------------------------|
| 32.34029                                                | -1.1132804                       | -1.0956278                                             | 1393121_at              | Agr2        | anterior gradient homolog 2 ( <i>Xenopus laevis</i> ) |
| 32.223553                                               | -1.0268033                       | 1.0024045                                              | 1376359_at              | Ms4a8a      | membrane-spanning 4-domains, subfamily A, member 8A   |
| 31.805708                                               | 1.0900272                        | 1.0509607                                              | 1387158_at              | Mep1b       | meprin 1 beta                                         |
| 29.839527                                               | 1.0573514                        | 1.059727                                               | 1392969_at              |             |                                                       |
| 29.29737                                                | 1.1641557                        | -1.1442182                                             | 1368335_at              | Apoa1       | apolipoprotein A-I                                    |
| 27.950108                                               | -1.0981983                       | -1.1441199                                             | 1377928_at              | Tm4sf20     | transmembrane 4 L six family member 20                |
| 27.105555                                               | -1.0730618                       | -1.0120633                                             | 1387994_at              | Hsd17b6     | hydroxysteroid (17-beta) dehydrogenase 6              |
| 26.922874                                               | -1.0485338                       | 1.0020348                                              | 1370631_at              | Reg3g       | regenerating islet-derived 3 gamma                    |
| 26.785194                                               | -1.0356189                       | -1.0601935                                             | 1394228_at              | Tmigd1      | transmembrane and immunoglobulin domain containing 1  |
| 26.169155                                               | -1.0377495                       | -1.0428827                                             | 1388147_at              | Muc3a       | mucin 3A, cell surface associated                     |
| 25.769123                                               | -1.1599573                       | -1.1091313                                             | 1392647_at              | LOC687992   | similar to Serum amyloid A-3 protein precursor        |
| 24.612743                                               | 1.1779646                        | 1.0691462                                              | 1374070_at              | Gpx2        | glutathione peroxidase 2                              |
| 24.404602                                               | 1.3734003                        | -1.4059792                                             | 1369953_a_at            | Cd24        | CD24 molecule                                         |
| 23.50129                                                | -1.0585811                       | 1.0432423                                              | 1369162_at              | Gucy2c      | guanylate cyclase 2C                                  |
| 23.497313                                               | -1.0114307                       | 1.0466768                                              | 1379393_at              | Vil1        | villin 1                                              |
| 23.289286                                               | -1.0369344                       | -1.0084523                                             | 1368467_at              | Cyp4f1      | cytochrome P450, family 4, subfamily f, polypeptide 1 |
| 23.148066                                               | 2.1113644                        | 1.6362264                                              | 1376191_at              | Hpgd        | hydroxyprostaglandin dehydrogenase 15 (NAD)           |
| 22.584402                                               | 1.9620341                        | 1.7251744                                              | 1387631_at              | Hpgd        | hydroxyprostaglandin dehydrogenase 15 (NAD)           |
| 21.965387                                               | 1.041887                         | 1.1134773                                              | 1387218_at              | Tff3        | trefoil factor 3, intestinal                          |
| 21.675919                                               | 1.0629786                        | -1.2024075                                             | 1388190_at              | Apob        | apolipoprotein B (including Ag(x) antigen)            |
| 21.61933                                                | 1.0133145                        | -1.019164                                              | 1387156_at              | Hsd17b2     | hydroxysteroid (17-beta) dehydrogenase 2              |
| 18.935299                                               | -1.1307874                       | -1.0006355                                             | 1375936_at              | Dsc2        | desmocollin 2                                         |
| 18.829332                                               | 1.0771842                        | -1.0052332                                             | 1387972_at              | Mucdhl      | mucin and cadherin like                               |
| 18.59812                                                | -1.073345                        | 1.0064859                                              | 1388074_at              | Krt20       | keratin 20                                            |
| 17.458109                                               | 1.0655547                        | 1.0381142                                              | 1382996_at              | RGD1566202  | similar to RIKEN cDNA 1810007E14                      |

| Fold change ([gua/GC-C high expressed DR] vs [control]) | Fold change ([DIO] vs [control]) | Fold change ([gua/GC-C low expressed DR] vs [control]) | Affymetrix probe set ID | Gene Symbol | Gene Title                                                           |
|---------------------------------------------------------|----------------------------------|--------------------------------------------------------|-------------------------|-------------|----------------------------------------------------------------------|
| 17.073355                                               | 1.0848356                        | 1.0663605                                              | 1370299_at              | Aldob       | aldolase B, fructose-bisphosphate                                    |
| 17.001299                                               | 1.0285859                        | -1.1787591                                             | 1376287_at              | Capn13      | calpain 13                                                           |
| 16.988863                                               | 1.079287                         | -1.0633701                                             | 1381082_at              | RGD1564357  | RGD1564357                                                           |
| 16.907627                                               | -1.1312453                       | 1.0144043                                              | 1389762_at              | RGD1311906  | similar to Fc fragment of IgG binding protein; IgG Fc binding protei |
| 16.829556                                               | 1.1692319                        | 1.0408734                                              | 1376117_at              | Slc44a4     | solute carrier family 44, member 4                                   |
| 16.274204                                               | -1.8676562                       | 1.0085442                                              | 1396304_at              |             |                                                                      |
| 15.947679                                               | -1.0584149                       | -1.016524                                              | 1385263_at              | Myo7b       | myosin VIIb                                                          |
| 15.3980465                                              | -1.3460321                       | -1.1136945                                             | 1370464_at              | Abcb1       | ATP-binding cassette, sub-family B (MDR/TAP), member 1               |
| 15.273306                                               | -1.199337                        | -1.0246488                                             | 1389783_s_at            | RGD1311906  | similar to Fc fragment of IgG binding protein; IgG Fc binding protei |
| 15.2423115                                              | 1.0139916                        | 1.0040486                                              | 1394174_at              | Defa-rs1    | defensin alpha-related sequence 1                                    |
| 14.850895                                               | -1.0454618                       | 1.0328736                                              | 1393953_at              | Eps8l3      | EPS8-like 3                                                          |
| 14.73513                                                | -1.058516                        | -1.059321                                              | 1392694_at              | RGD1562344  | similar to Gm566 protein                                             |
| 13.712856                                               | 1.0693414                        | 1.001088                                               | 1370503_s_at            | Epb4.1l3    | erythrocyte protein band 4.1-like 3                                  |
| 13.624498                                               | 1.0719824                        | -1.5570296                                             | 1371530_at              | Krt8        | keratin 8                                                            |
| 13.324245                                               | -1.2469163                       | -1.1546512                                             | 1389654_at              | Pls1        | Plastin 1 (I isoform)                                                |
| 12.838897                                               | -1.0325505                       | -1.1085513                                             | 1385767_at              | LOC304000   | cell adhesion molecule JCAM                                          |
| 12.632386                                               | -1.0495781                       | -1.3305156                                             | 1379656_a_at            |             |                                                                      |
| 12.609954                                               | 1.1485777                        | 1.0726142                                              | 1369100_at              | Nlrp6       | NLR family, pyrin domain containing 6                                |
| 12.376696                                               | -1.1055664                       | -1.0205555                                             | 1376292_at              |             |                                                                      |
| 12.073219                                               | 1.012987                         | 1.0429072                                              | 1374657_at              | Anks4b      | ankyrin repeat and sterile alpha motif domain containing 4B          |
| 11.937026                                               | 1.0187414                        | -1.0711844                                             | 1378690_at              | Ly6al       | lymphocyte antigen 6 complex, locus A-like                           |
| 11.882774                                               | 1.1035506                        | 1.1561176                                              | 1393241_at              | Prss32      | protease, serine, 32                                                 |
| 11.833633                                               | 1.2895955                        | -1.1892283                                             | 1383554_at              | Rnf128      | ring finger protein 128                                              |
| 11.616765                                               | 1.0598674                        | 1.1177361                                              | 1368520_at              | Apoa4       | apolipoprotein A-IV                                                  |
| 11.400645                                               | 1.1164505                        | 1.3468087                                              | 1380577_at              | Abcg2       | ATP-binding cassette, sub-family G (WHITE), member 2                 |

| Fold change ([gua/GC-C high expressed DR] vs [control]) | Fold change ([DIO] vs [control]) | Fold change ([gua/GC-C low expressed DR] vs [control]) | Affymetrix probe set ID | Gene Symbol        | Gene Title                                                           |
|---------------------------------------------------------|----------------------------------|--------------------------------------------------------|-------------------------|--------------------|----------------------------------------------------------------------|
| 11.0176115                                              | -1.0725214                       | -1.2562748                                             | 1368339_at              | S100g              | S100 calcium binding protein G                                       |
| 10.982584                                               | -1.1256068                       | -1.0199848                                             | 1383898_at              | Fam3d              | family with sequence similarity 3, member D                          |
| 10.930318                                               | 1.0158699                        | -1.0956024                                             | 1368515_at              | Epb4.1l3           | erythrocyte protein band 4.1-like 3                                  |
| 10.864786                                               | -1.184054                        | -1.1132499                                             | 1374095_at              |                    |                                                                      |
| 10.8537                                                 | -1.116913                        | 1.0280777                                              | 1376248_at              | Sult2b1            | sulfotransferase family, cytosolic, 2B, member 1                     |
| 10.723244                                               | -1.0492104                       | 1.0642967                                              | 1391707_at              |                    |                                                                      |
| 10.6501875                                              | 1.025223                         | 1.0788774                                              | 1391936_a_at            |                    |                                                                      |
| 10.625221                                               | 1.1272062                        | -1.3189434                                             | 1378288_at              | Ostalpha           | organic solute transporter alpha                                     |
| 10.200327                                               | -1.1107224                       | -1.0970387                                             | 1383855_at              | Degs2              | degenerative spermatocyte homolog 2, lipid desaturase (Drosophi      |
| 10.189022                                               | -1.0674437                       | -2.1932821                                             | 1388051_at              | Slc26a3            | solute carrier family 26, member 3                                   |
| 9.919589                                                | -1.0470651                       | -1.029085                                              | 1368278_at              | Lgals2             | lectin, galactoside-binding, soluble 2                               |
| 9.916595                                                | 1.2640928                        | 1.1027277                                              | 1377637_at              |                    |                                                                      |
| 9.696659                                                | -1.0030786                       | -1.0898958                                             | 1393845_a_at            | Tmc4               | transmembrane channel-like 4                                         |
| 9.678709                                                | 1.1380019                        | -1.0333991                                             | 1380834_at              | Btnl8              | butyrophilin-like 8                                                  |
| 9.634692                                                | -1.0247678                       | 1.061924                                               | 1376163_at              | Clrn3              | clarin 3                                                             |
| 9.49958                                                 | 1.0156207                        | -1.1236516                                             | 1378753_at              | Ocln               | occludin                                                             |
| 9.479225                                                | -1.0825157                       | -1.4942826                                             | 1394039_at              | Klf5               | Kruppel-like factor 5                                                |
| 9.261945                                                | 1.0101215                        | 1.1424137                                              | 1388238_at              | Defcr24            | defensin related cryptdin 24                                         |
| 9.015608                                                | 1.2213624                        | -1.9454161                                             | 1370349_a_at            | LOC680367 /// Rup2 | similar to Urinary protein 3 precursor (RUP-3) /// urinary protein 2 |
| 8.999008                                                | -1.1149011                       | -1.0723684                                             | 1371089_at              | Yc2                | glutathione S-transferase Yc2 subunit                                |
| 8.97663                                                 | 1.0723041                        | 1.0575533                                              | 1368238_at              | Reg3b              | regenerating islet-derived 3 beta                                    |
| 8.947264                                                | -1.000822                        | -1.0255433                                             | 1373330_at              | LOC690323          | similar to Myosin-15 (Myosin XV) (Unconventional myosin-15)          |
| 8.84533                                                 | 1.1128107                        | 1.0981957                                              | 1392209_at              | Gcnt3              | glucosaminyl (N-acetyl) transferase 3, mucin type                    |
| 8.83832                                                 | -1.0337001                       | -1.0404627                                             | 1380967_at              | Nts                | neurotensin                                                          |
| 8.806242                                                | -1.0475233                       | -1.0580055                                             | 1373329_at              | Tmprss2            | transmembrane protease, serine 2                                     |

| Fold change ([gua/GC-C high expressed DR] vs [control]) | Fold change ([DIO] vs [control]) | Fold change ([gua/GC-C low expressed DR] vs [control]) | Affymetrix probe set ID | Gene Symbol | Gene Title                                                       |
|---------------------------------------------------------|----------------------------------|--------------------------------------------------------|-------------------------|-------------|------------------------------------------------------------------|
| 8.775939                                                | 1.1818664                        | 1.0882225                                              | 1391279_at              | Scin        | Scinderin                                                        |
| 8.612451                                                | -1.150608                        | -1.2218848                                             | 1368121_at              | Akr7a3      | aldo-keto reductase family 7, member A3 (aflatoxin aldehyde redu |
| 8.589368                                                | -1.2017964                       | -1.2438842                                             | 1392547_at              | MGC105649   | hypothetical LOC302884                                           |



**Supplementary Table 2.** Primers used for quantitative PCR

| Gene                                                              | Forward                  | Reverse                 |
|-------------------------------------------------------------------|--------------------------|-------------------------|
| 36B4                                                              | TCATTGTGGGAGCAGACAATGTG  | AGGTCCTCCTTGGTGAACACAAA |
| Glyceraldehyde 3-phosphate dehydrogenase (GAPDH)                  | GGCACAGTCAAGGCTGAGAAT    | GGTGGTGAAGACGCCAGTAGA   |
| Guanylin (rat)                                                    | TCACTGTGCAGGATGGAGAC     | TGTTTGGGTCCTGAGCAATG    |
| Guanylyl cyclase C (GC-C) (rat)                                   | TGCGACAGTGCAAATACGAC     | ACTCGACCACCCCAAAGATC    |
| Peroxisome proliferator-activated receptor gamma (PPAR $\gamma$ ) | AGTCTGCTGATCTGCGAGCC     | CTTTCCTGTCAAGATCGCCC    |
| PPAR $\gamma$ 2                                                   | GGCACGAGCATCAGTGGGAA     | AGTGCATCAGCGAAGGCACC    |
| CCAAT/enhancer-binding protein alpha (C/EBP $\alpha$ )            | ATAAAGCCAAACAGCGCAAC     | CGGTCATTGTCACTGGTCAA    |
| Adiponectin (Adipoq)                                              | ATGGCAGAGATGGCACTCCT     | CCTTCCGCTCCTGTCAATCCA   |
| Glucose transporter 4 (GLUT4)                                     | GGGCTGTGAGTGAGTGCTTTC    | CAGCGAGGCAAGGCTAGA      |
| Fatty acid synthase (Fasn)                                        | AGTTCTGGGCCAACCTCATTG    | AGGCGTCGAACTTGGACAGAT   |
| Perilipin                                                         | GGTACACACCGTGCAGAAGA     | GGGAAGCGGGACATAGTGTA    |
| Acyl-Coenzyme A dehydrogenase, C-4 to C-12 straight chain (Acadm) | GATATTGCCAACCACTCGC      | TGATAGATCTTGGCGTCCCG    |
| Acyl-Coenzyme A dehydrogenase, long chain (Acadl)                 | GCCAAAAGGTCTGGGAGTGAT    | TCGAGCTTCACGATTGGTGAC   |
| Carnitine palmitoyltransferase 1A (Cpt1a)                         | TTGTGGGAGTATGTCATGGCC    | CCATTGTAGCCTTGTGGGCTT   |
| Acyl-Coenzyme A oxidase 1, palmitoyl (Acox1)                      | TTACGTCACTTTTACCCCGGC    | ACCGCACCTGGTCGTAGATTT   |
| F4/80                                                             | ACCAATGTACCAGTTCTACAACCT | AGGGAATCCTTTTGCATGTGA   |
| Guanylin (human)                                                  | GGTCCCATCCTCTGTAGCA      | CAGCGTAGGCACAGATTTCA    |
| Guanylyl cyclase C (GC-C) (human)                                 | TCGCATTGGAGTTCACCTCTG    | ATTCTCAAAGGGAGGCCAGT    |
